# Supplementary material for: East Asian methane emissions inferred from high-resolution inversions of GOSAT and TROPOMI observations: a comparative and evaluative analysis
Source: Copernicus journal article supplement (doi:10.5194/acp-2022-508), 2022-08-02
Supplement: Supplementary file 1 [file acp-2022-508-supplement.pdf]

*Supplement of*

**East Asian methane emissions inferred from high-resolution inversions of GOSAT and TROPOMI observations: a comparative and evaluative analysis**

**Ruosi Liang et al.**

*Correspondence to:* Yuzhong Zhang (zhangyuzhong@westlake.edu.cn)

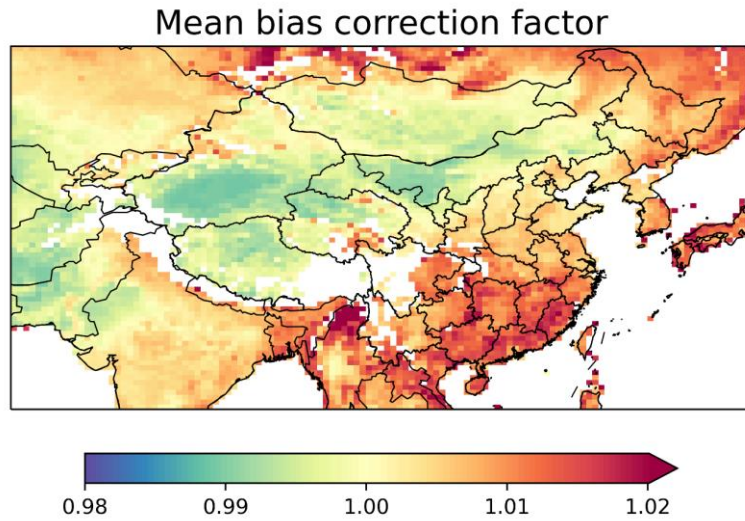

Figure S1: Bias correction factor derived by Lorente et al. (2021) for original TROPOMI XCH<sub>4</sub> retrievals.

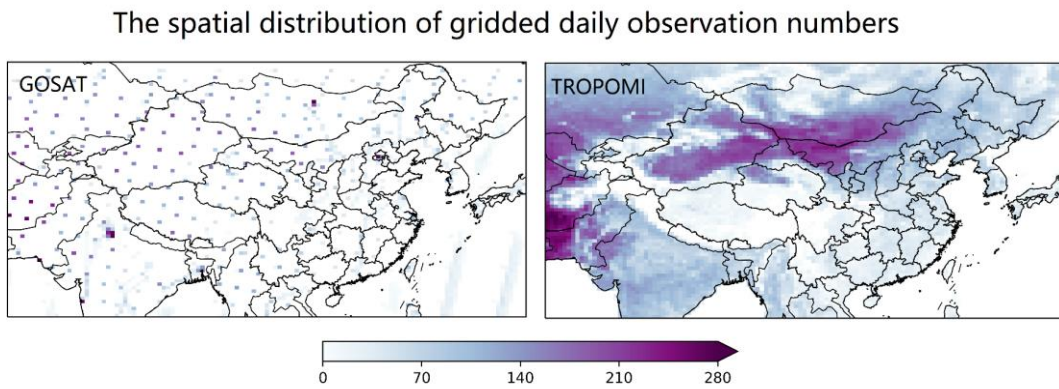

Figure S2: Numbers of gridded daily average observations for GOSAT and TROPOMI during 2019.

### The choice of the regularization parameter $\gamma$

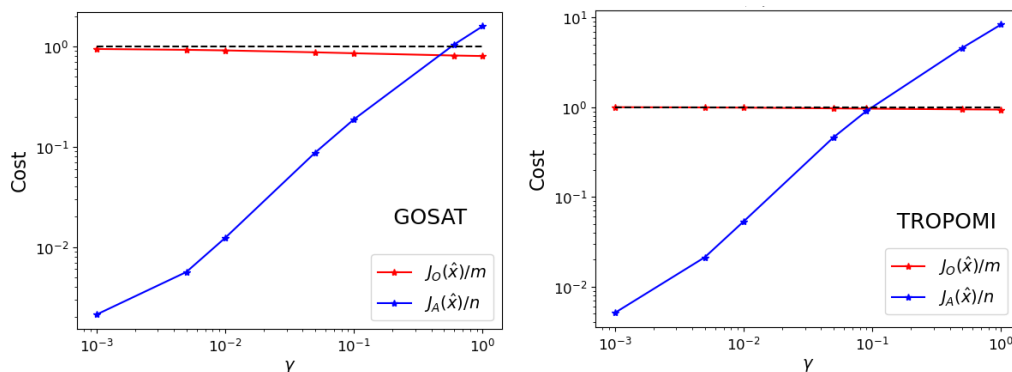

**Figure S3: Determination of the regularization parameter by finding the crossing point of  $J_A(\hat{x}) = (\hat{x} - x_A)^T S_A^{-1} (\hat{x} - x_A)$  and  $J_O(\hat{x}) = (y - K\hat{x})^T S_0^{-1} (y - K\hat{x})$ .  $n$  is the dimension of the state vector and  $m$  is the dimension of the observation vector. Left panel is for the GOSAT inversion and right panel for the TROPOMI inversion.**

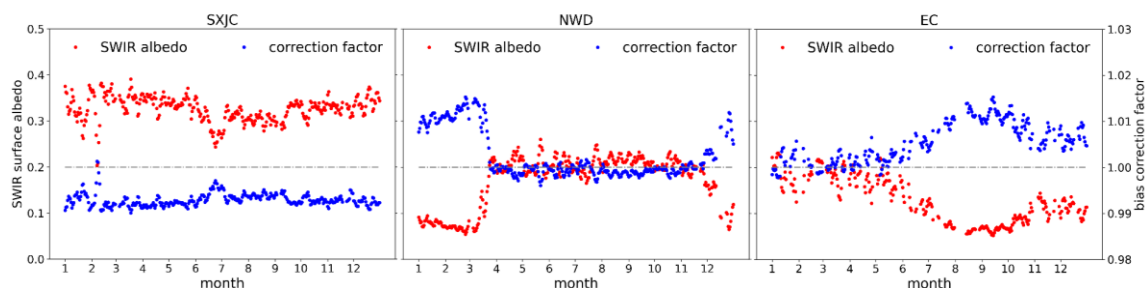

**Figure S4: Time series of average surface albedo and bias correction factor over SXJC, NWD and EC. The bias correction algorithm used in this TROPOMI product is a function of the SWIR effective surface albedo where the correction is forced to be zero at surface albedo around 0.2. When the surface albedo is less than 0.2, there is a bias correction factor greater than 1, and conversely, the bias correction factor is less than 1.**

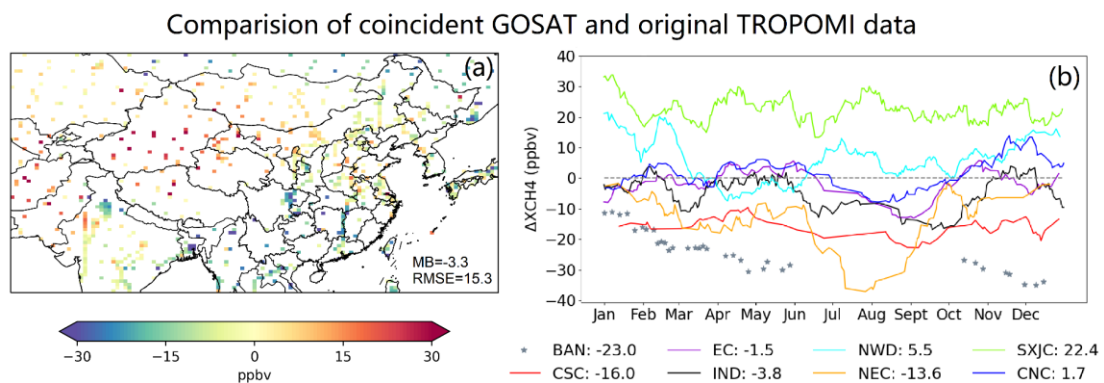

**Figure S5:** Average differences in XCH<sub>4</sub> between GOSAT and original (not bias-corrected) TROPOMI (TROPOMI-GOSAT) shown on the 0.5° × 0.625° grid (a) and by region (b). Annual averages of regional differences (in ppbv) are inset in Panel (b).

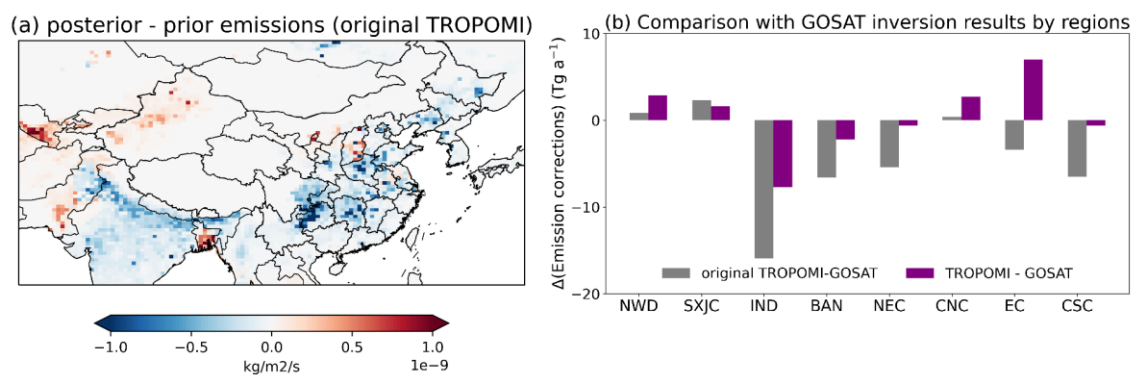

**Figure S6:** Results of inversions of original TROPOMI retrievals without application of the bias correction scheme. Panel (a) shows the adjustment to prior emissions by this inversion. Panel (b) compares regional inversion results using original and bias-corrected TROPOMI data, relative to the GOSAT inversion results.

**Table S1: Surface observation sites used for evaluation**

| Site                    | Code | Lon    | Lat   | Alt(m) | Measurements                                         |
|-------------------------|------|--------|-------|--------|------------------------------------------------------|
| Anmyeon-do, South Korea | AMY  | 126.33 | 36.54 | 87     | Hourly & daily, <i>in situ</i>                       |
| Pha Din, Vietnam        | PDI  | 103.52 | 21.57 | 1478   | Hourly & daily, <i>in situ</i>                       |
| Lulin, Taiwan China     | LLN  | 120.87 | 23.47 | 2867   | Weekly, flask                                        |
| Ulaan Uul, Mongolia     | UUM  | 110.10 | 44.45 | 1012   | Weekly, flask                                        |
| Waliguan, China         | WLG  | 100.89 | 36.29 | 3815   | Weekly, flask                                        |
| Xianghe, China          | XH   | 116.96 | 39.75 | 36     | Hourly & daily,<br>FTIR total column<br>measurements |
| Hefei, China            | HF   | 117.17 | 31.9  | -      | Hourly & daily,<br>FTIR total column<br>measurements |

**Table S2: Mean 2019 methane emissions used in GEOS-Chem<sup>a</sup>**

| Sources<br>Type (Tg a <sup>-1</sup> ) | China <sup>b</sup> |           |          | East Asia <sup>c</sup> |           |           |
|---------------------------------------|--------------------|-----------|----------|------------------------|-----------|-----------|
|                                       | Prior              | Posterior |          | Prior                  | Posterior |           |
|                                       |                    | TROPOMI   | GOSAT    |                        | TROPOMI   | GOSAT     |
| <b>Anthropogenic</b>                  |                    |           |          |                        |           |           |
| Oil                                   | 1.0                | 1.6       | 1.2      | 1.5                    | 2.1       | 1.8       |
| Gas                                   | 0.2                | 0.2       | 0.2      | 3.6                    | 3.7       | 3.9       |
| Coal                                  | 16.6               | 18.0      | 16.2     | 19.4                   | 22.1      | 18.7      |
| Livestock                             | 11.9               | 13.1      | 12.7     | 36.6                   | 36.9      | 41.6      |
| Landfill                              | 2.9                | 3.2       | 2.7      | 5.1                    | 5.6       | 5.7       |
| Wastewater                            | 8.1                | 9.0       | 8.1      | 16.0                   | 17.1      | 18.0      |
| Rice                                  | 14.5               | 17.1      | 15.9     | 24.8                   | 29.6      | 30.0      |
| Others                                | 6.1                | 6.9       | 6.1      | 9.6                    | 10.3      | 10.3      |
| <b>Natural</b>                        |                    |           |          |                        |           |           |
| Biomass<br>burning                    | 0.3                | 0.3       | 0.3      | 1.8                    | 2.1       | 2.3       |
| Wetlands                              | 3.2                | 4.1       | 3.6      | 9.1                    | 11.2      | 11.1      |
| Seeps                                 | 0.3                | 0.5       | 0.3      | 0.7                    | 0.9       | 0.7       |
| Termites                              | 0.8                | 0.9       | 0.9      | 1.8                    | 1.9       | 2.1       |
| <b>Total source<sup>d</sup></b>       |                    |           |          |                        |           |           |
| Anthropogenic                         | 61.3               | 69.1±0.9  | 63.0±0.9 | 116.7                  | 127.4±1.2 | 130.0±1.1 |
| Natural                               | 4.5                | 5.8±0.2   | 5.1±0.2  | 13.4                   | 16.1±0.3  | 16.2±0.3  |
| All                                   | 65.8               | 74.9±1.0  | 68.1±1.0 | 130.0                  | 143.5±1.4 | 146.2±1.2 |

<sup>a</sup> Mean 2019 values of methane sources in China and the whole inversion domain. It contains prior emissions described above and posterior emissions obtained by two inversions using TROPOMI and GOSAT observations respectively.

<sup>b</sup> Methane emissions in China.

<sup>c</sup> Methane emissions in the entire East Asian domain.

<sup>d</sup> Uncertainties are showed here ( $1\sigma$  standard deviations derived from posterior error covariance matrices).
